# Supplementary material for: Contamination tracer testing with seabed drills: IODP Expedition 357
Source: Copernicus journal article supplement (doi:10.5194/sd-23-39-2017), 2017-11-30
Supplement: Supplementary file 4 [file sd-23-39-2017-supplement.zip]

M0075A

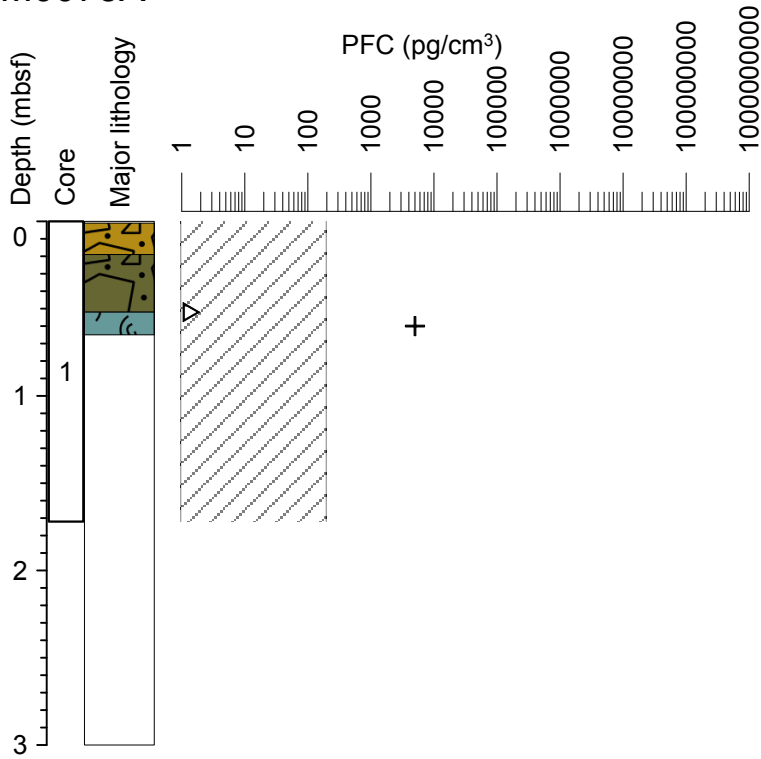

+ PFC\_EXT\_U

▷ X\_PFC\_U

Basaltic breccia, carbonate matrix

Talc-amphibole-chlorite schist

Polymict breccia
