# Supplementary material for: Contamination tracer testing with seabed drills: IODP Expedition 357
Source: Copernicus journal article supplement (doi:10.5194/sd-23-39-2017), 2017-11-30
Supplement: Supplementary file 5 [file sd-23-39-2017-supplement.zip]

Archive with 19 entries (18 files):
- sd-23-39-2017-supplement-title-page.pdf
- Supplemental Material/
- Supplemental Material/Supplemental Figure S8_M0071B.pdf
- Supplemental Material/Supplemental Figure S11_M0072B.pdf
- Supplemental Material/Supplemental Figure S5_M0070B.pdf
- Supplemental Material/Supplemental Figure S4_M0070A.pdf
- Supplemental Material/Supplemental Figure S7_M0071A.pdf
- Supplemental Material/Supplemental Figure S3_M0069A.pdf
- Supplemental Material/Supplemental Figure S10_M0072A.pdf
- Supplemental Material/Supplemental Figure S2_M0068B.pdf
- Supplemental Material/Supplemental Figure S15_M0076A.pdf
- Supplemental Material/Supplemental Figure S9_M0071C.pdf
- Supplemental Material/Supplemental Figure S1_M0068A.pdf
- Supplemental Material/Supplemental Figure S14_M0075B.pdf
- Supplemental Material/Supplemental Table S1.xlsx
- Supplemental Material/Supplemental Figure S16_M0076B.pdf
- Supplemental Material/Supplemental Figure S13_M0075A.pdf
- Supplemental Material/Supplemental Figure S12_M0074A.pdf
- Supplemental Material/Supplemental Figure S6_M0070C.pdf
