# Supplementary material for: Contamination tracer testing with seabed drills: IODP Expedition 357
Source: Copernicus journal article supplement (doi:10.5194/sd-23-39-2017), 2017-11-30
Supplement: Supplementary file 5 [file sd-23-39-2017-supplement.zip › sd-23-39-2017-supplement-title-page.pdf]

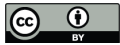

## *Supplement of*

# **Contamination tracer testing with seabed drills: IODP Expedition 357**

**Beth N. Orcutt et al.**

*Correspondence to:* Beth N. Orcutt ([borcutt@bigelow.org](mailto:borcutt@bigelow.org))

- [sd-23-39-2017-supplement-title-page.pdf](#)
- Supplemental Material
  - [Supplemental Figure S10\\_M0072A.pdf](#)
  - [Supplemental Figure S11\\_M0072B.pdf](#)
  - [Supplemental Figure S12\\_M0074A.pdf](#)
  - [Supplemental Figure S13\\_M0075A.pdf](#)
  - [Supplemental Figure S14\\_M0075B.pdf](#)
  - [Supplemental Figure S15\\_M0076A.pdf](#)
  - [Supplemental Figure S16\\_M0076B.pdf](#)
  - [Supplemental Figure S1\\_M0068A.pdf](#)
  - [Supplemental Figure S2\\_M0068B.pdf](#)
  - [Supplemental Figure S3\\_M0069A.pdf](#)
  - [Supplemental Figure S4\\_M0070A.pdf](#)
  - [Supplemental Figure S5\\_M0070B.pdf](#)
  - [Supplemental Figure S6\\_M0070C.pdf](#)
  - [Supplemental Figure S7\\_M0071A.pdf](#)
  - [Supplemental Figure S8\\_M0071B.pdf](#)
  - [Supplemental Figure S9\\_M0071C.pdf](#)
  - [Supplemental Table S1.xlsx](#)

The copyright of individual parts of the supplement might differ from the CC BY 4.0 License.
