# Supplementary material for: Contamination tracer testing with seabed drills: IODP Expedition 357
Source: Copernicus journal article supplement (doi:10.5194/sd-23-39-2017), 2017-11-30
Supplement: Supplementary file 5 [file sd-23-39-2017-supplement.zip › Supplemental Material/Supplemental Figure S2_M0068B.pdf]

## M0068B

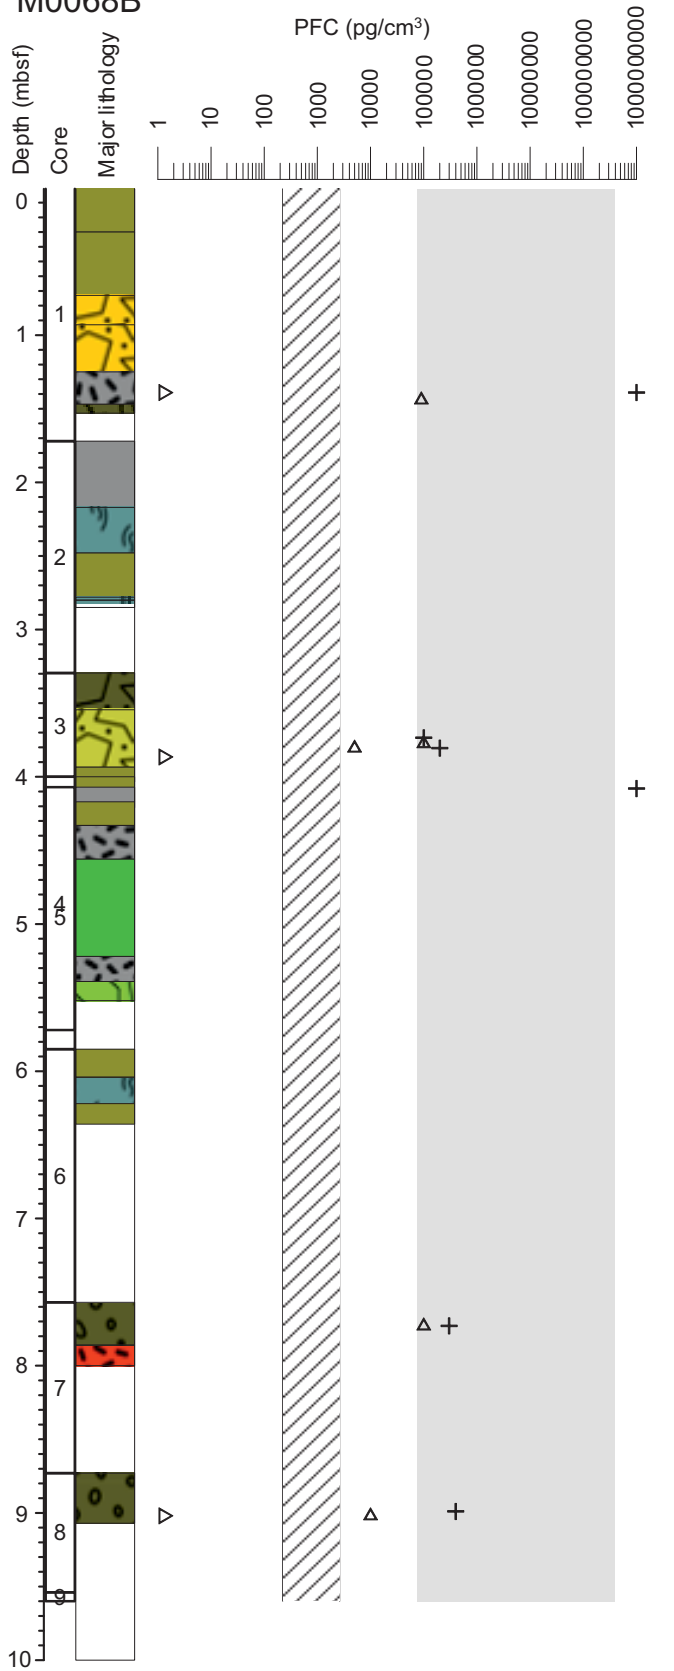

PFC\_INT\_U

X PFC U

tinite-rich breccia

—

carb

carbonate matrix

carbonate matrix

Serpentinized dunite

## Serpentinized harzburgite

Serpentinized harzburgite

Gabbro/gabbronorite  
QuartziteOxide gabbro  
MetagabbroMetagabbro  
Metabasalt

Metabasalt  
Talc amphib

Breccia, clast supported

Polymict breccia

## Polymict breccia

Mixed rubble/other rubble
