# Supplementary material for: Contamination tracer testing with seabed drills: IODP Expedition 357
Source: Copernicus journal article supplement (doi:10.5194/sd-23-39-2017), 2017-11-30
Supplement: Supplementary file 5 [file sd-23-39-2017-supplement.zip › Supplemental Material/Supplemental Figure S7_M0071A.pdf]

M0071A

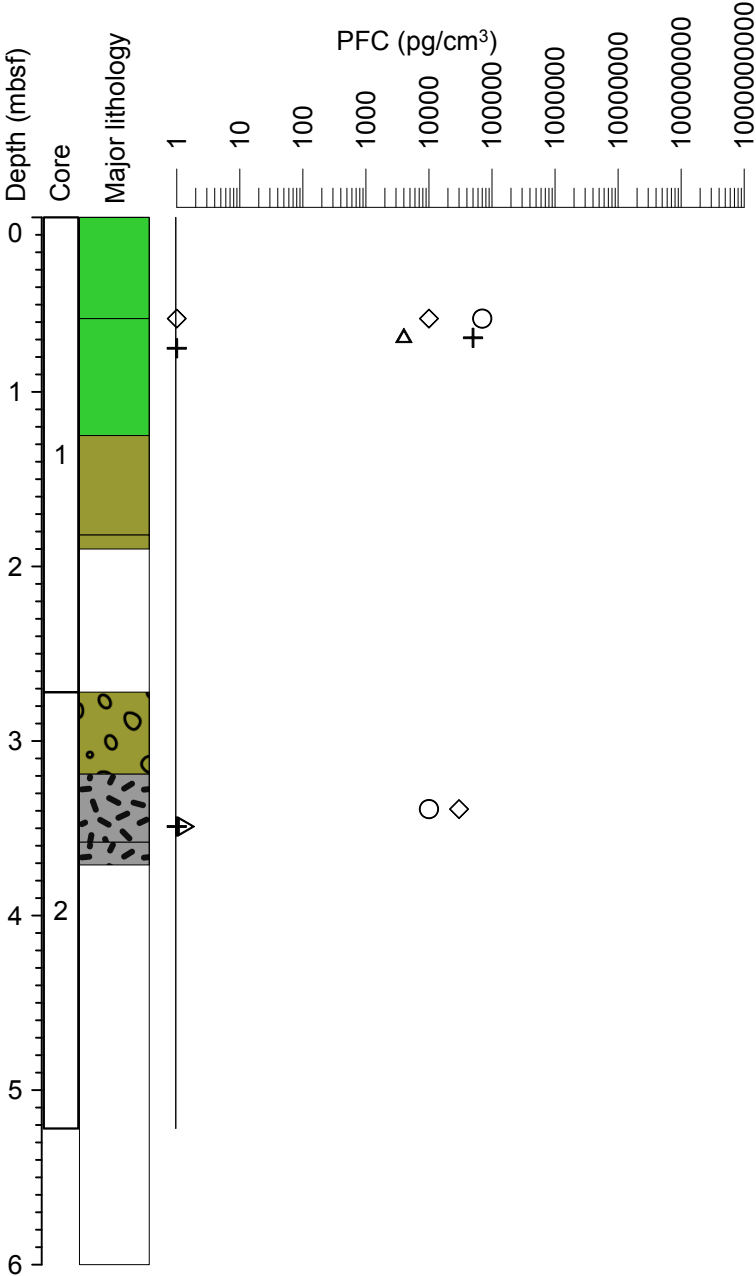

- + PFC\_EXT\_U
- ◇ PFC\_INT\_F
- △ PFC\_INT\_U
- ☆ X\_PFC\_F
- ▷ X\_PFC\_U

- Serpentinized dunite
- Serpentinized harzburgite
- Serpentinized harzburgite rubble
- Metagabbro
