# Supplementary material for: Contamination tracer testing with seabed drills: IODP Expedition 357
Source: Copernicus journal article supplement (doi:10.5194/sd-23-39-2017), 2017-11-30

M0075B

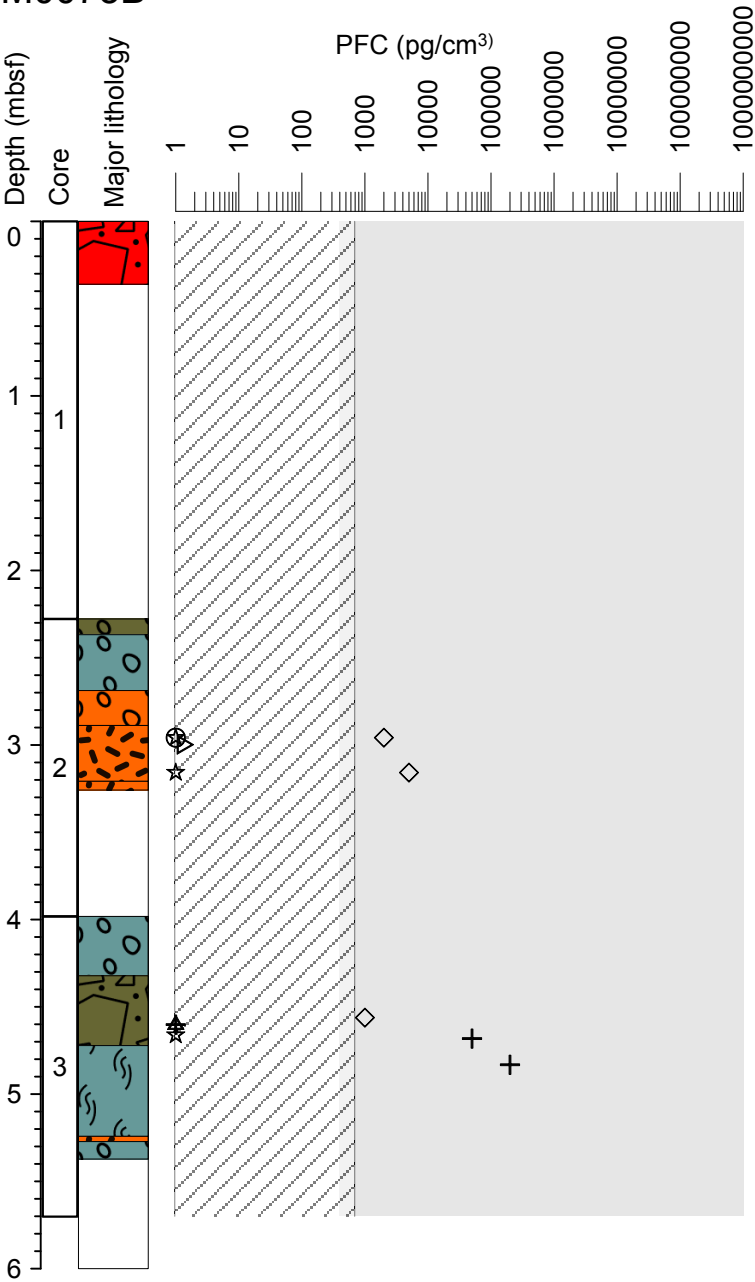

- PFC\_EXT\_F
- + PFC\_EXT\_U
- ◇ PFC\_INT\_F
- △ PFC\_INT\_U
- ☆ X\_PFC\_F
- ▷ X\_PFC\_U
- ▨ PFC Niskin water
- PFC Liner fluid

- Serpentinized harzburgite rubble
- Metadolerite
- Dolerite rubble
- Basaltic breccia
- Talc-amphibole-chlorite schist
- Talc-amphibole-chlorite schist rubble
- Polymict breccia
- Mixed rubble

M0075B

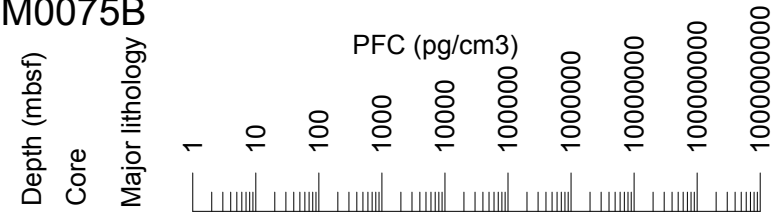

Supplement: Supplementary file 5 [file sd-23-39-2017-supplement.zip › Supplemental Material/Supplemental Figure S14_M0075B.pdf]
