# Supplementary material for: Contamination tracer testing with seabed drills: IODP Expedition 357
Source: Copernicus journal article supplement (doi:10.5194/sd-23-39-2017), 2017-11-30
Supplement: Supplementary file 5 [file sd-23-39-2017-supplement.zip › Supplemental Material/Supplemental Table S1.xlsx]

## Sheet: Read Me
Supplemental Material, Orcutt et al.
Table S1.
Caption. Summary of PFC concentrations in rock samples collected during IODP Expedition 357.
Column headers:	LOCATION	Sampling location. Variable: BIG, Bigelow Laboratory for Ocean Sciences; KCC, Kochi Core Center; SHIP, Shipboard
	SITE	IODP Expedition Site M00
	HOLE	IODP Expedition Hole
	CORE	Core Number
	SEC	Core Section
	TOP	Top of WRC used for PFC sample, in cm within Core Section
	BOT	Bottom of WRC used for PFC sample, in cm within Core Section
	MBSF TOP	Depth of Top of WRC used for PFC sample, in meters below seafloor (mbsf)
	U OR F	Description of handling of WRC. Variables: F, flamed; U, unflamed.
	SAMPLE TYPE	Description of sample type. Variables: PFC EXT, exterior of WRC; PFC INT, interior of WRC; X PFC, washed WRC
	PFC (pg/cm3)	Concentration of PFC in sample, in pg of PFC per cubic centimeter samples, in scientific notation
Table S2.
Caption. Summary of PFC concentrations in fluid samples collected during IODP Expedition 357. n.m., not measured because sample not collected.
Column headers:	SITE	IODP Expedition Site M00
	HOLE	IODP Expedition Hole
	Niskin water PFC, minimum (pg/ml)	Minimum concentration of PFC in Sensor Package Niskin bottle fluid samples, in pg PFC per ml fluid
	Niskin water PFC, maximum (pg/ml)	Maximum concentration of PFC in Sensor Package Niskin bottle fluid samples, in pg PFC per ml fluid
	Liner fluid PFC, minimum (pg/ml)	Minimum concentration of PFC in Liner Fluid samples, in pg PFC per ml fluid
	Liner fluid PFC, maximum (pg/ml)	Maximum concentration of PFC in Liner Fluid samples, in pg PFC per ml fluid

## Sheet: Table S1_Rock Samples
LOCATION	SITE	HOLE	CORE	SEC	TOP	BOT	MBSF TOP	U OR F	SAMPLE TYPE	PFC (pg/cm3)
KCC	68	A	1	1	12	21	0.12	U	PFC ext	60000
KCC	68	A	1	1	12	21	0.12	U	PFC INT	7000
SHIP	68	B	1	1	139	141	1.39	U	PFC EXT	ADL
SHIP	68	B	3	1	44	51	3.735	U	PFC EXT	100000
SHIP	68	B	3	1	51	64	3.805	U	PFC EXT	200000
SHIP	68	B	5	1	1	14	4.08	U	PFC EXT	ADL
SHIP	68	B	7	1	16	29	7.73	U	PFC EXT	300000
SHIP	68	B	8	1	26	26	8.99	U	PFC EXT	400000
SHIP	68	B	1	1	144	147	1.44	U	PFC INT	90000
SHIP	68	B	3	1	48	51	3.775	U	PFC INT	100000
SHIP	68	B	3	1	51	57	3.805	U	PFC INT	5000
SHIP	68	B	7	1	16	29	7.73	U	PFC INT	100000
SHIP	68	B	8	1	29	31	9.02	U	PFC INT	10000
BIG	68	B	3	1	51	57	3.865	U	X PFC	BD
KCC	68	B	1	1	139	144	1.39	U	X PFC	BD
KCC	68	B	3	1	51	57	3.865	U	X PFC	BD
KCC	68	B	8	1	29	34	9.02	U	X PFC	BD
KCC	69	A	5	1	129	137	8.17	F	PFC ext	40000
SHIP	69	A	5	1	129	137	8.17	F	PFC EXT	BD
KCC	69	A	5	1	137	151	8.25	F	PFC ext	BD
KCC	69	A	10	1	104	124	15.76	F	PFC EXT	BD
SHIP	69	A	4	1	25	35	5.41	U	PFC EXT	BD
SHIP	69	A	4	1	75	85	5.91	U	PFC EXT	200
KCC	69	A	4	1	121	131	6.37	U	PFC ext	BD
SHIP	69	A	7	1	69	99	11.01	U	PFC EXT	BD
KCC	69	A	7	1	73	75	11.05	U	PFC ext	BD
SHIP	69	A	9	2	118	124	14.55	U	PFC EXT	BD
SHIP	69	A	9	2	129	133	14.66	U	PFC EXT	200
KCC	69	A	5	1	129	137	8.17	F	PFC INT	BD
SHIP	69	A	5	1	137	151	8.25	F	PFC INT	BD
KCC	69	A	5	1	137	151	8.25	F	PFC INT	2000
KCC	69	A	10	1	104	124	15.76	F	PFC INT	BD
SHIP	69	A	4	1	25	35	5.41	U	PFC INT	BD
SHIP	69	A	4	1	75	85	5.91	U	PFC INT	BD
SHIP	69	A	7	1	69	99	11.01	U	PFC INT	200
SHIP	69	A	9	2	124	129	14.61	U	PFC INT	300
BIG	69	A	9	2	124	129	14.61	F	X PFC	500
BIG	69	A	9	2	129	133	14.66	F	X PFC	BD
KCC	69	A	5	1	137	151	8.25	F	X PFC	BD
KCC	69	A	7	1	80	82	11.12	F	X PFC	BD
BIG	69	A	9	2	106	114	15.78	U	X PFC	700
BIG	69	A	9	2	118.5	124	14.55	U	X PFC	BD
KCC	69	A	4	1	121	131	6.37	U	X PFC	BD
KCC	69	A	7	1	73	75	11.05	U	X PFC	BD
KCC	70	A	2	1	78	86	2.56	F	PFC ext	BD
KCC	70	A	3	1	19	29	3.05	F	PFC ext	20000
SHIP	70	A	2	1	86	87	2.64	U	PFC EXT	200
KCC	70	A	2	1	87	97	2.65	U	PFC ext	BD
SHIP	70	A	3	1	28	28	3.14	U	PFC EXT	10000
KCC	70	A	3	1	19	29	3.05	F	PFC INT	BD
SHIP	70	A	2	1	86	87	2.64	U	PFC INT	200
KCC	70	A	2	1	87	97	2.65	U	PFC INT	BD
KCC	70	A	2	1	78	86	2.56	F	X PFC	BD
BIG	70	A	3	1	28	38	3.14	U	X PFC	BD
SHIP	70	B	1	1	30	30	0.3	U	PFC EXT	BD
BIG	70	B	1	1	30	38	0.3	U	X PFC	BD
SHIP	70	C	1	1	62	63	0.62	U	PFC EXT	30000
SHIP	70	C	3	1	71	79	3.41	U	PFC EXT	1000000
KCC	70	C	3	1	79	85	3.49	U	PFC ext	BD
SHIP	70	C	1	1	60	62	0.6	U	PFC INT	600
SHIP	70	C	3	1	85	91	3.55	U	PFC INT	100000
KCC	70	C	1	1	59	62	0.59	F	X PFC	BD
KCC	70	C	3	1	85	91	3.55	F	X PFC	BD
KCC	70	C	1	1	57	61	0.57	U	X PFC	BD
KCC	70	C	3	1	79	85	3.49	U	X PFC	10000
KCC	71	A	1	2	0	11	0.58	F	PFC ext	70000
KCC	71	A	2	1	67	77	3.39	F	PFC ext	10000
KCC	71	A	1	2	11	18	0.69	U	PFC ext	50000
SHIP	71	A	1	2	17	17	0.75	U	PFC EXT	BD
SHIP	71	A	2	1	77	77	3.49	U	PFC EXT	BD
SHIP	71	A	1	2	0	1	0.58	F	PFC INT	BD
KCC	71	A	1	2	0	11	0.58	F	PFC INT	10000
KCC	71	A	2	1	67	77	3.39	F	PFC INT	30000
KCC	71	A	1	2	11	18	0.69	U	PFC INT	4000
BIG	71	A	2	1	77	86	3.49	U	X PFC	BD
SHIP	71	B	1	2	0	1	0.59	U	PFC EXT	90
SHIP	71	B	2	1	64	66	2.36	U	PFC EXT	BD
SHIP	71	B	3	1	18	18	3.62	U	PFC EXT	BD
SHIP	71	B	2	1	64	66	2.36	U	PFC INT	BD
KCC	71	B	2	1	64	66	2.36	F	X PFC	BD
BIG	71	B	2	1	61	64	2.33	U	X PFC	3000
KCC	71	B	2	1	53	58	2.25	U	X PFC	400000
KCC	71	B	3	1	0	10	3.44	U	X PFC	BD
KCC	71	C	2	1	78	84	3.46	F	PFC ext	BD
KCC	71	C	2	1	84	90	3.52	U	PFC ext	BD
SHIP	71	C	2	1	90	90	3.58	U	PFC EXT	100000
SHIP	71	C	2	1	96	96	3.64	U	PFC EXT	100000
SHIP	71	C	3	1	5	5	5.07	U	PFC EXT	60000
SHIP	71	C	5	CC	5	5	7.84	U	PFC EXT	10000
SHIP	71	C	6	1	60	60	10.23	U	PFC EXT	20000
KCC	71	C	6	1	70	74	10.33	U	PFC ext	30000
SHIP	71	C	9	1	10	10	9.77	U	PFC EXT	5000
KCC	71	C	2	1	78	84	3.46	F	PFC INT	BD
SHIP	71	C	2	1	83	84	3.51	U	PFC INT	BD
KCC	71	C	2	1	84	90	3.52	U	PFC INT	BD
SHIP	71	C	3	1	8	8	5.1	U	PFC INT	BD
SHIP	71	C	6	1	62	64	10.25	U	PFC INT	BD
KCC	71	C	6	1	70	74	10.33	U	PFC INT	BD
BIG	71	C	6	1	64	70	10.27	F	X PFC	500
KCC	71	C	9	1	10	14	9.77	F	X PFC	BD
KCC	71	C	3	1	0	10	5.02	U	X PFC	BD
KCC	71	C	5	CC	5	10	7.84	U	X PFC	20000
KCC	71	C	6	1	70	74	10.33	U	X PFC	5000
KCC	71	C	9	1	0	7	9.67	U	X PFC	BD
KCC	72	A	1	1	53	60	0.53	F	PFC EXT	BD
SHIP	72	A	1	1	53	54	0.53	U	PFC EXT	BD
KCC	72	A	1	1	53	60	0.53	F	PFC INT	BD
SHIP	72	A	1	1	53	54	0.53	U	PFC INT	BD
BIG	72	A	2	1	1	6	1.73	U	X PFC	BD
KCC	72	A	1	1	60	66	0.6	U	X PFC	BD
KCC	72	B	5	1	53	56	6.505	F	PFC ext	BD
KCC	72	B	8	CC	5	20	12.328	F	PFC ext	BD
SHIP	72	B	1	1	55	55	0.55	U	PFC EXT	10
KCC	72	B	1	1	55	62	0.55	U	PFC ext	7000
SHIP	72	B	1	1	57	58	0.57	U	PFC EXT	BD
SHIP	72	B	3	1	31	32	3.75	U	PFC EXT	BD
SHIP	72	B	5	1	48	48	6.465	U	PFC EXT	6
SHIP	72	B	7	1	103	105	10.018	U	PFC EXT	NM
KCC	72	B	7	1	126	136	10.248	U	PFC ext	20000
SHIP	72	B	7	1	128	130	10.268	U	PFC EXT	30
KCC	72	B	8	CC	0	5	12.278	U	PFC ext	BD
SHIP	72	B	8	CC	5	5	12.328	U	PFC EXT	100
SHIP	72	B	5	1	53	55	6.515	F	PFC INT	1
KCC	72	B	5	1	53	56	6.505	F	PFC INT	BD
SHIP	72	B	7	1	109	115	10.078	F	PFC INT	BD
SHIP	72	B	7	1	126	130	10.248	F	PFC INT	20
KCC	72	B	8	CC	5	20	12.328	F	PFC INT	BD
SHIP	72	B	3	1	36	36	3.8	U	PFC INT	1
KCC	72	B	1	1	62	65	0.62	F	X PFC	BD
KCC	72	B	7	1	109	115	10.078	F	X PFC	BD
KCC	72	B	7	1	115	125	10.138	F	X PFC	8000
KCC	72	B	1	1	55	62	0.55	U	X PFC	BD
KCC	72	B	3	1	34	36	3.78	U	X PFC	BD
KCC	72	B	5	1	40	43	6.385	U	X PFC	BD
KCC	72	B	7	1	126	136	10.248	U	X PFC	ADL
KCC	72	B	8	CC	0	5	12.278	U	X PFC	BD
SHIP	74	A	1	1	10	20	0.1	U	PFC EXT	BD
KCC	74	A	1	1	50	60	0.5	U	PFC EXT	600
SHIP	75	A	1	CC	8	9	0.6	U	PFC EXT	5000
KCC	75	A	1	CC	0	4	0.52	U	X PFC	BD
KCC	75	B	2	1	68	78	2.958	F	PFC ext	BD
SHIP	75	B	2	1	85	85	4.832	U	PFC EXT	200000
KCC	75	B	3	1	62	68	4.602	U	PFC ext	BD
SHIP	75	B	3	1	70	70	4.682	U	PFC EXT	50000
SHIP	75	B	2	1	68	78	2.958	F	PFC INT	2000
SHIP	75	B	2	1	88	93	3.158	F	PFC INT	5000
SHIP	75	B	3	1	58	62	4.562	F	PFC INT	1000
KCC	75	B	3	1	62	68	4.602	U	PFC INT	BD
KCC	75	B	2	1	68	78	2.958	F	X PFC	BD
KCC	75	B	2	1	88	93	3.158	F	X PFC	BD
KCC	75	B	3	1	68	70	4.662	F	X PFC	BD
KCC	75	B	2	1	72	88	2.998	U	X PFC	BD
SHIP	76	A	1	1	35	40	0.35	U	PFC EXT	70
KCC	76	B	3	1	102	110	4.459	F	PFC ext	BD
KCC	76	B	9	1	34	41	13.214	F	PFC ext	BD
KCC	76	B	3	1	110	125	4.539	U	PFC ext	BD
SHIP	76	B	3	1	123	125	4.669	U	PFC EXT	70
KCC	76	B	5	1	14	28	6.869	U	PFC ext	6000
SHIP	76	B	5	1	26	30	6.989	U	PFC EXT	30
SHIP	76	B	7	1	101	102	10.734	U	PFC EXT	2000
KCC	76	B	7	1	105	120	10.774	U	PFC ext	BD
SHIP	76	B	9	1	42	43	13.294	U	PFC EXT	80
KCC	76	B	9	1	43	52	13.304	U	PFC ext	4000
SHIP	76	B	9	1	67	68	13.544	U	PFC EXT	80
KCC	76	B	10	1	91	111	15.051	U	PFC ext	100000
SHIP	76	B	3	1	102	104	4.459	F	PFC INT	1000
KCC	76	B	3	1	102	110	4.459	F	PFC INT	BD
SHIP	76	B	7	1	103	105	10.754	F	PFC INT	BD
KCC	76	B	9	1	34	41	13.214	F	PFC INT	BD
SHIP	76	B	9	1	38	41	13.254	F	PFC INT	100
KCC	76	B	3	1	110	125	4.539	U	PFC INT	40000
KCC	76	B	5	1	14	28	6.869	U	PFC INT	BD
KCC	76	B	7	1	105	120	10.774	U	PFC INT	BD
KCC	76	B	9	1	43	52	13.304	U	PFC INT	20000
KCC	76	B	10	1	91	111	15.051	U	PFC INT	BD
BIG	76	B	5	1	28	36	7.009	F	X PFC	4000
SHIP	76	B	5	1	32	34	7.049	F	X PFC	50
BIG	76	B	7	1	95	105	10.674	F	X PFC	1000
KCC	76	B	3	1	110	125	4.539	U	X PFC	BD
KCC	76	B	5	1	14	28	6.869	U	X PFC	6000
KCC	76	B	7	1	105	120	10.774	U	X PFC	BD
KCC	76	B	10	1	91	111	15.051	U	X PFC	BD

## Sheet: Table S2_Fluid Samples
SITE	HOLE	Niskin water PFC, minimum (pg/ml)	Niskin water PFC, maximum (pg/ml)	Liner fluid pFC, minimum (pg/ml)	Liner fluid PFC, maximum (pg/ml)
68	A	20	40	1	1
68	B	600	7000	200000	1000000000
69	A	1	60	1	30
70	A	1	40	50	4000
70	B	4	10	7000	7000
70	C	n.m.	n.m.	6000	50000
71	A	1	1	1	1
71	B	1	200	1	5
71	C	1000	50000	500	100000
72	A	1	1	1	1
72	B	1	10	1	3
74	A	1	1	n.m.	n.m.
75	A	1	200	40000	40000
75	B	1	700	400	1000000000
76	A	n.m.	n.m.	100	100
76	B	4	10	1	60
