# Supplementary figures and images for: Contamination tracer testing with seabed drills: IODP Expedition 357
Source: Copernicus journal article supplement (doi:10.5194/sd-23-39-2017), 2017-11-30

M0072B

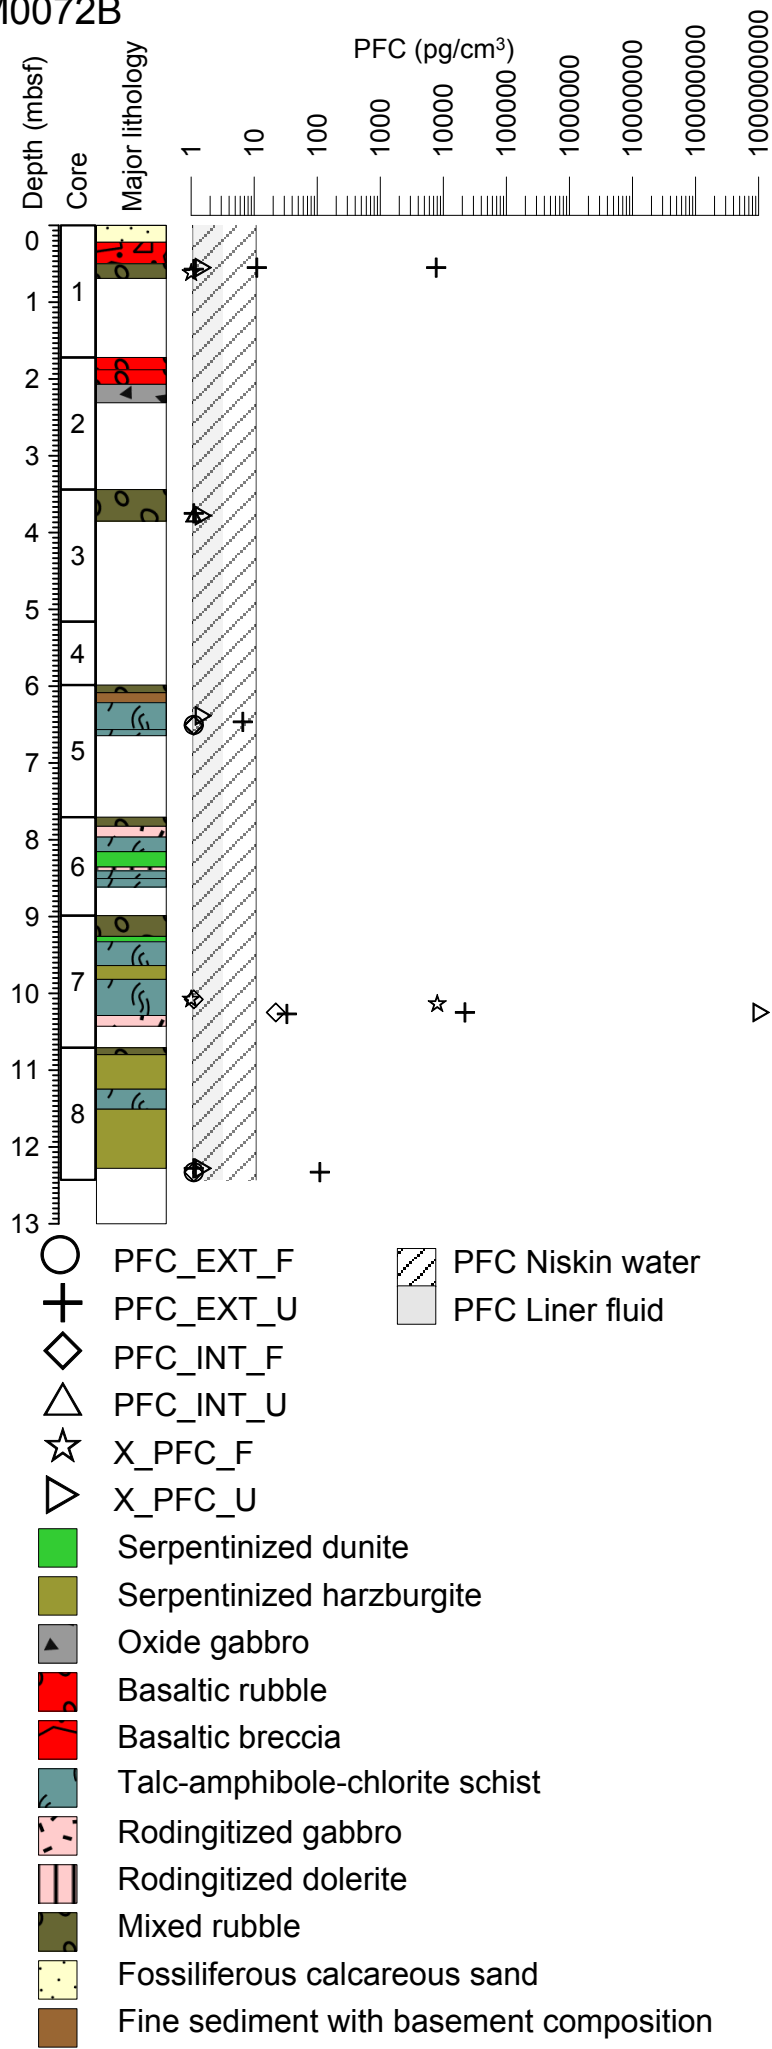

Supplement: Supplementary file 1 [file sd-23-39-2017-supplement.zip]

M0070A

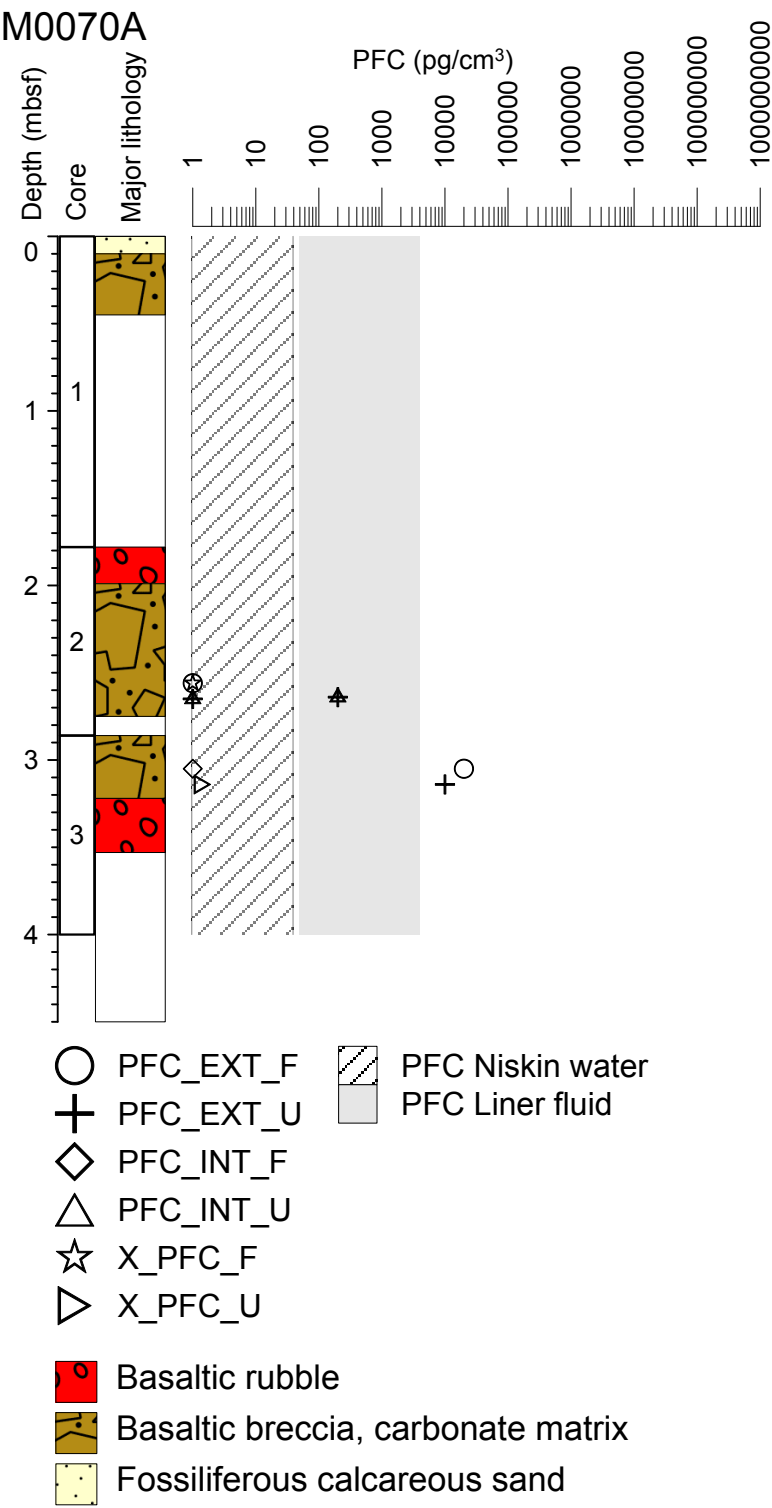

Supplement: Supplementary file 2 [file sd-23-39-2017-supplement.zip]

M0076B

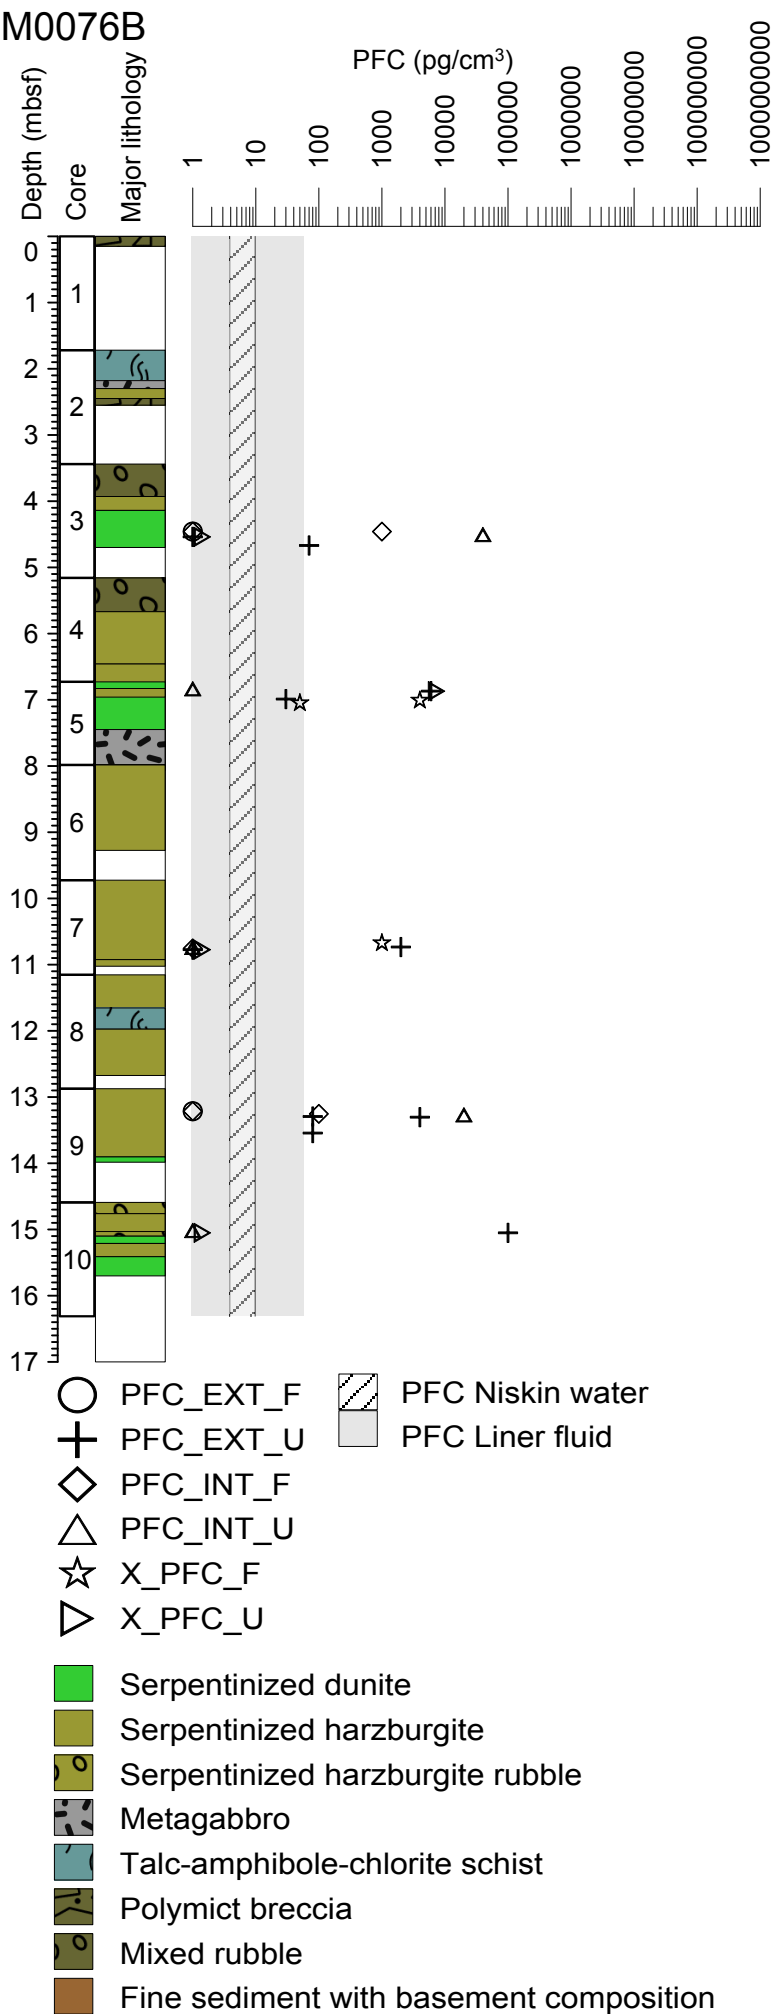

Supplement: Supplementary file 3 [file sd-23-39-2017-supplement.zip]

M0071B

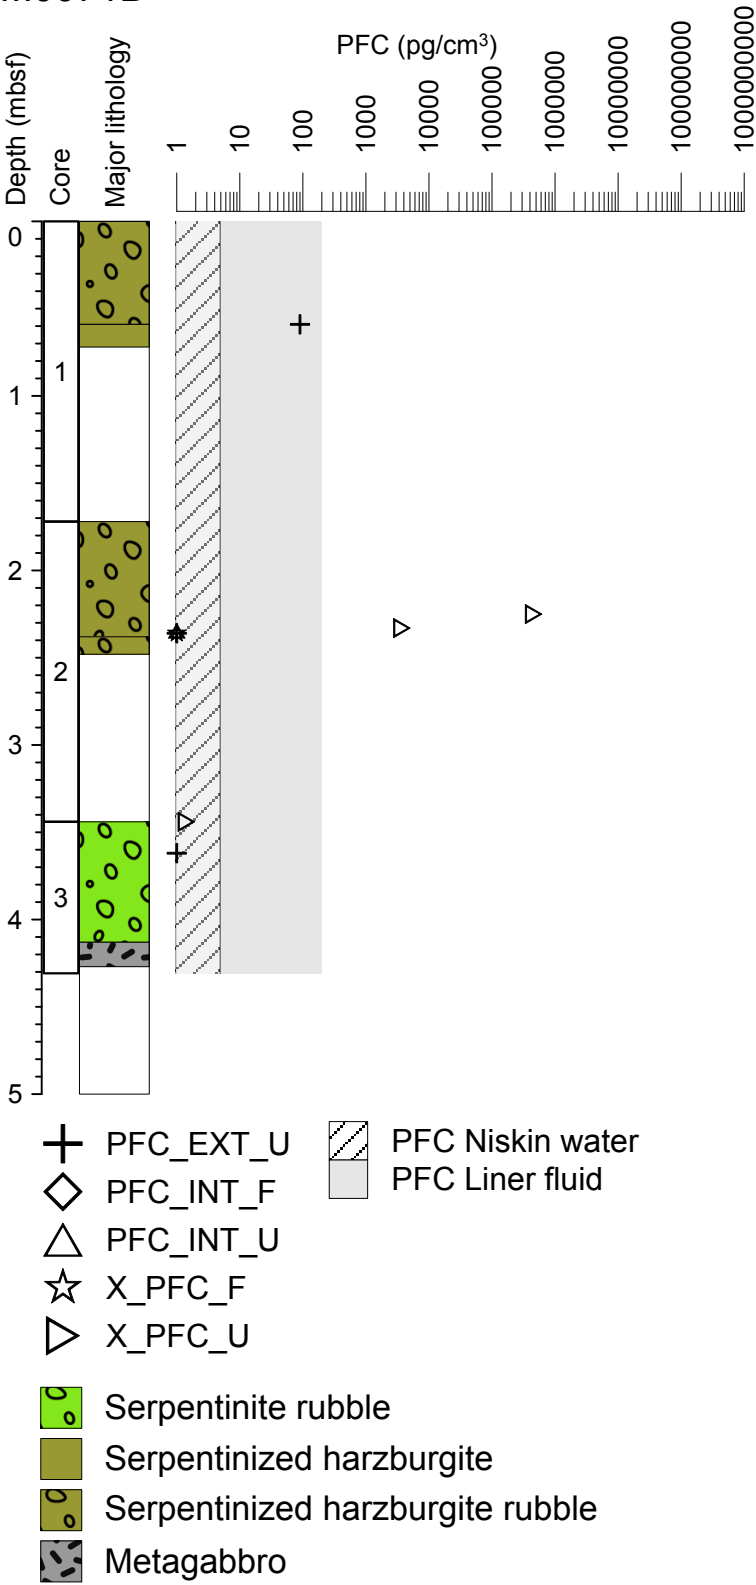

Supplement: Supplementary file 5 [file sd-23-39-2017-supplement.zip › Supplemental Material/Supplemental Figure S8_M0071B.pdf]

M0070B

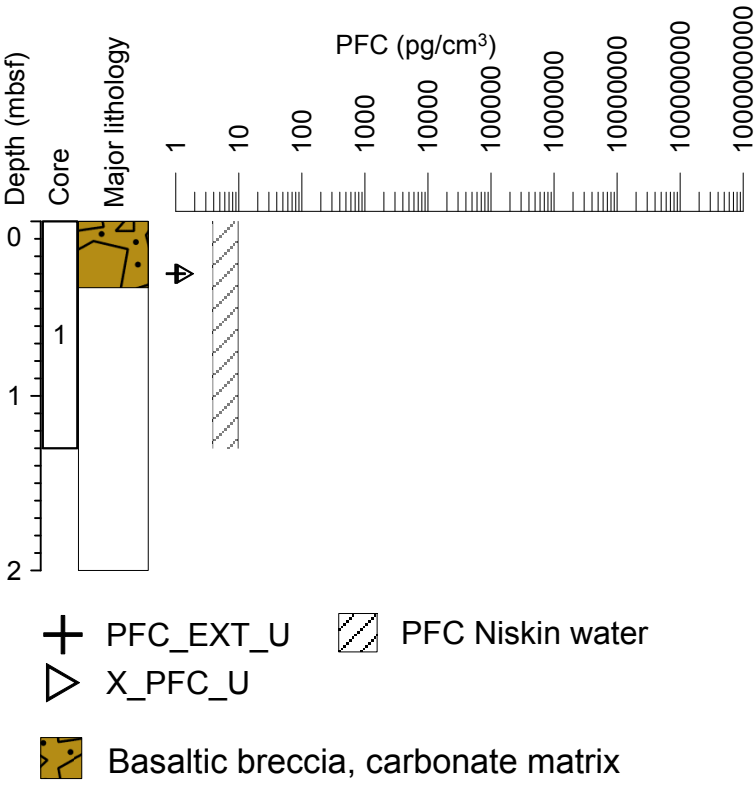

Supplement: Supplementary file 5 [file sd-23-39-2017-supplement.zip › Supplemental Material/Supplemental Figure S5_M0070B.pdf]

M0069A

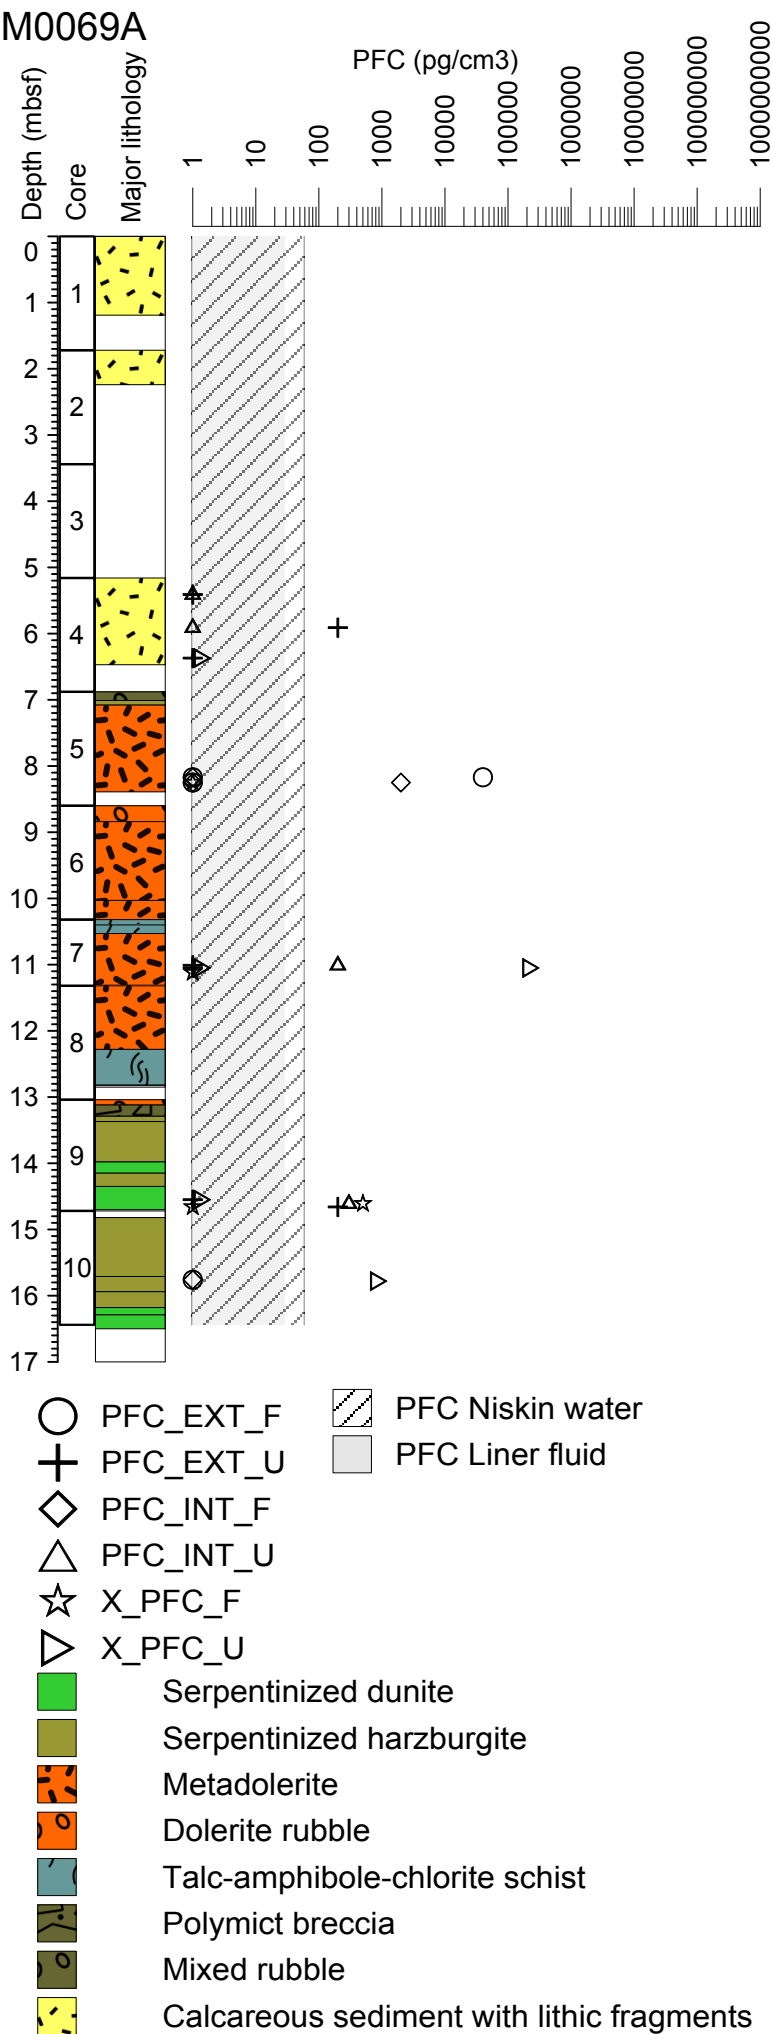

Supplement: Supplementary file 5 [file sd-23-39-2017-supplement.zip › Supplemental Material/Supplemental Figure S3_M0069A.pdf]

M0072A

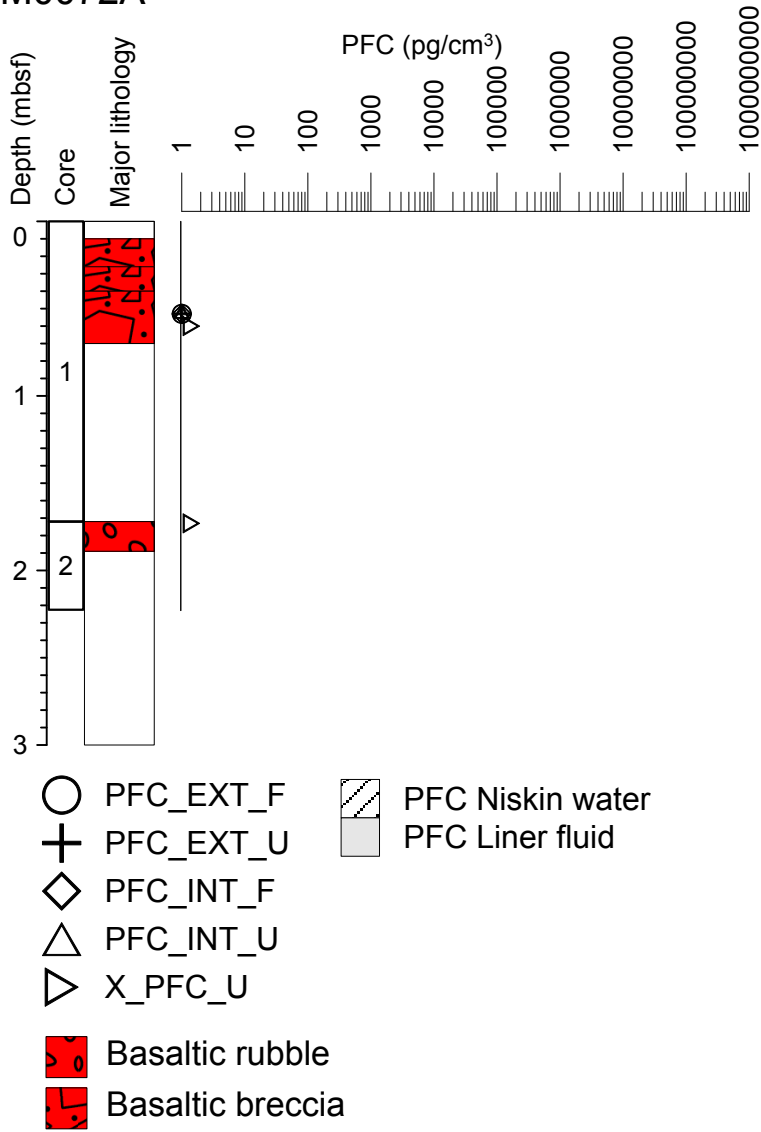

Supplement: Supplementary file 5 [file sd-23-39-2017-supplement.zip › Supplemental Material/Supplemental Figure S10_M0072A.pdf]

M0076A

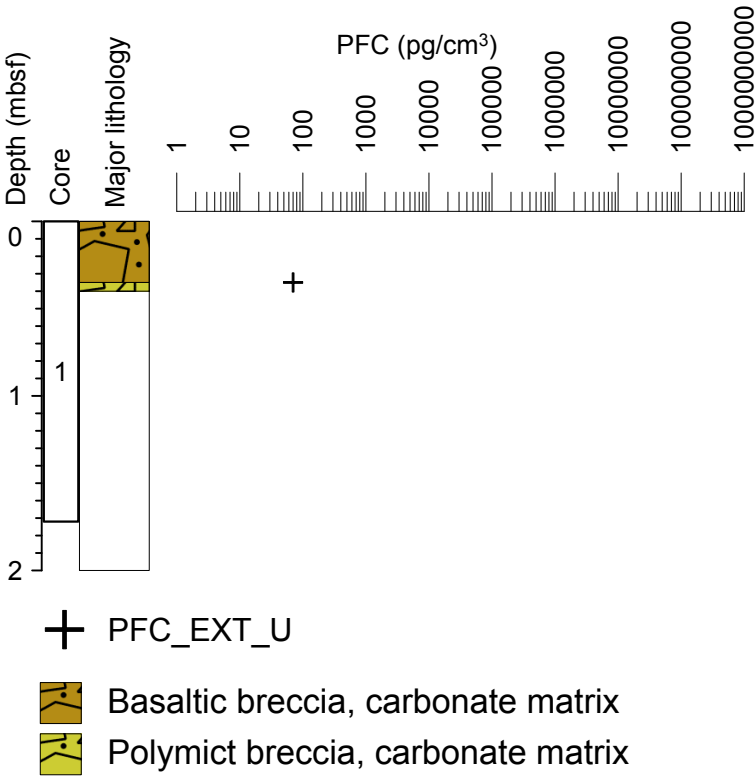

Supplement: Supplementary file 5 [file sd-23-39-2017-supplement.zip › Supplemental Material/Supplemental Figure S15_M0076A.pdf]

M0071C

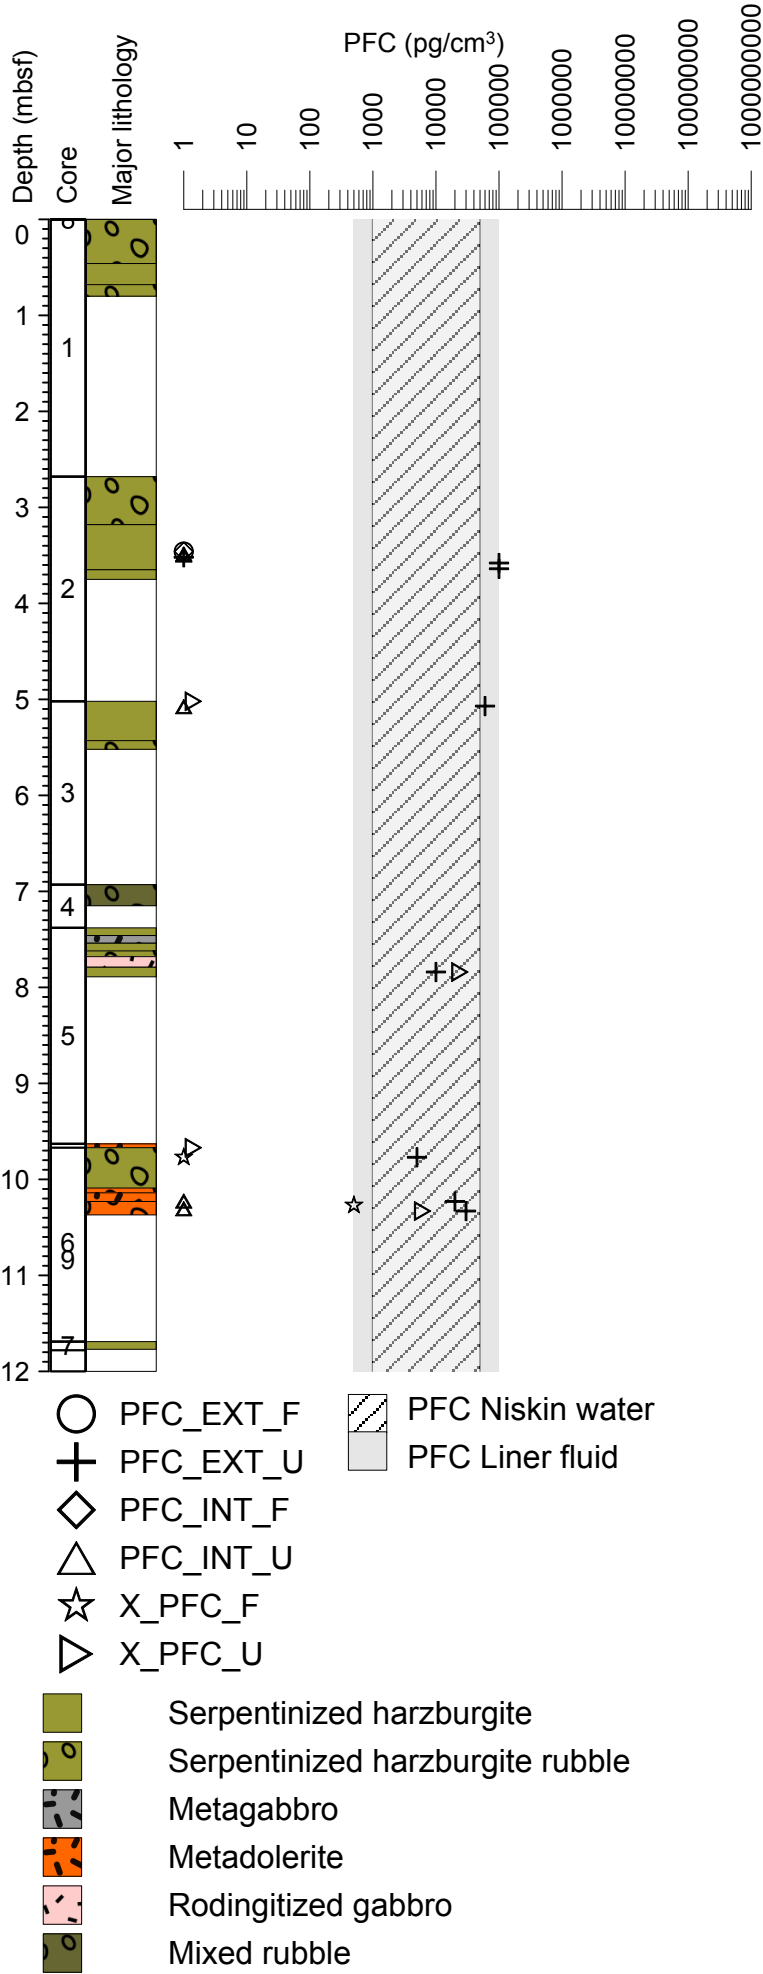

Supplement: Supplementary file 5 [file sd-23-39-2017-supplement.zip › Supplemental Material/Supplemental Figure S9_M0071C.pdf]

## M0068A

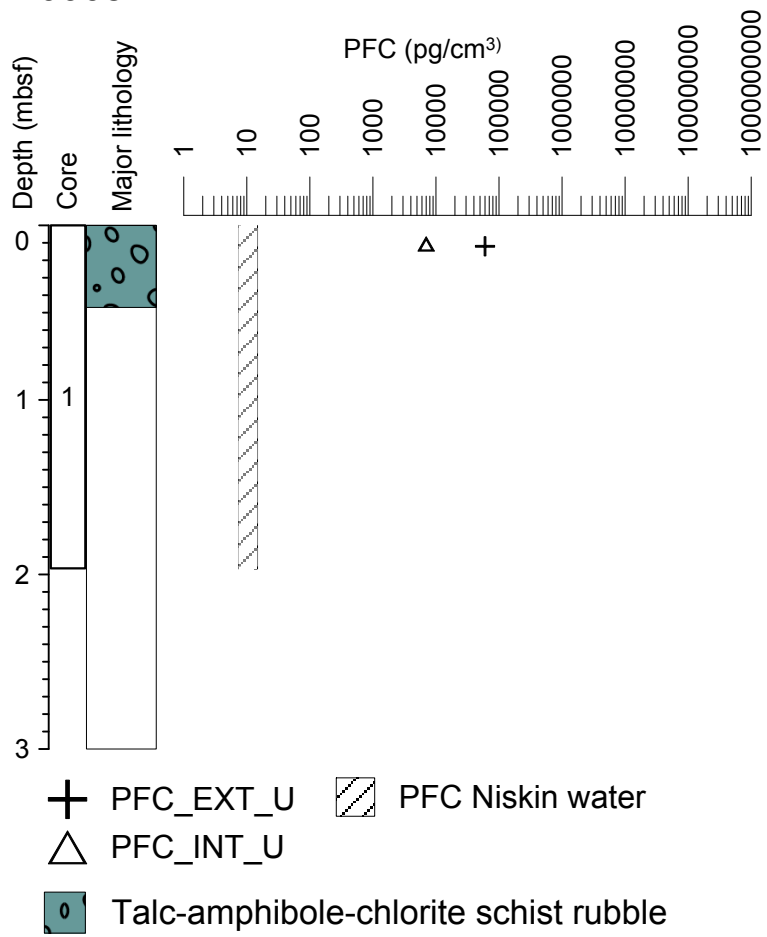

Supplement: Supplementary file 5 [file sd-23-39-2017-supplement.zip › Supplemental Material/Supplemental Figure S1_M0068A.pdf]

M0074A

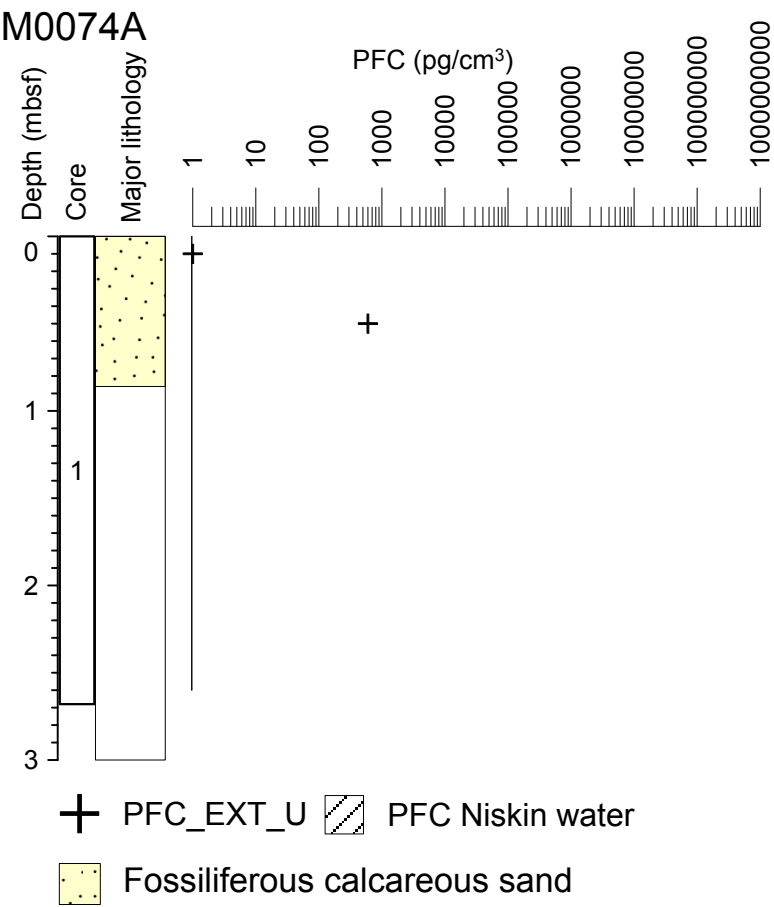

Supplement: Supplementary file 5 [file sd-23-39-2017-supplement.zip › Supplemental Material/Supplemental Figure S12_M0074A.pdf]

M0070C

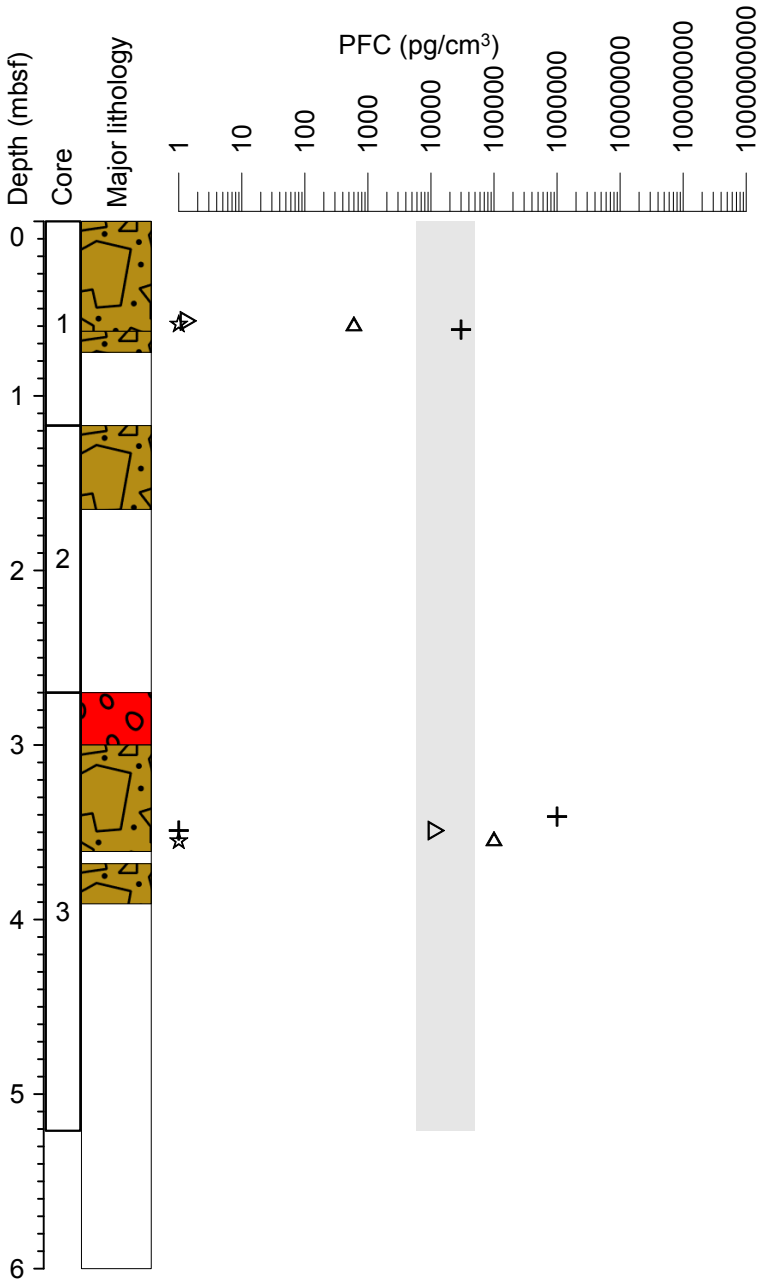

Supplement: Supplementary file 5 [file sd-23-39-2017-supplement.zip › Supplemental Material/Supplemental Figure S6_M0070C.pdf]

M0075B

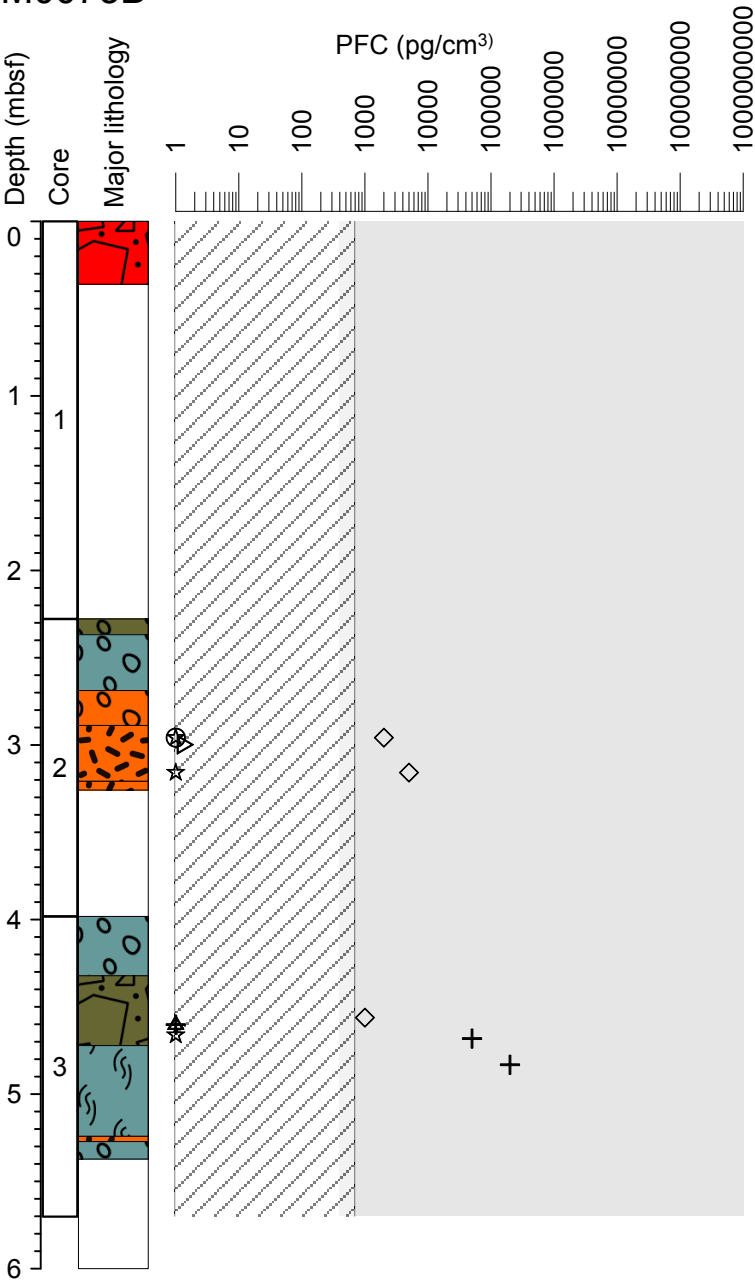

M0075B

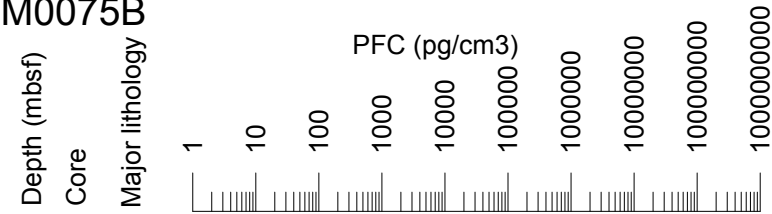

Supplement: Supplementary file 6 [file sd-23-39-2017-supplement.zip]
